# Supplementary material for: A Novel Antimicrobial Mechanism of Azalomycin F Acting on Lipoteichoic Acid Synthase and Cell Envelope
Source: MDPI journal article supplement (doi:10.3390/molecules29040856), 2024-02-14
Supplement: s1 [file s1]

## Supplementary Materials

# A Novel Antimicrobial Mechanism of Azalomycin F Acting on Lipoteichoic Acid Synthase and Cell Envelope

Zilong Luo <sup>1,†</sup>, Pingyi Li <sup>1,†</sup>, Duoduo Zhang <sup>1,†</sup>, Jianping Zhu <sup>2</sup>, Wan Wang <sup>3</sup>, Wenjia Zhao <sup>1</sup>, Peibo Li <sup>4</sup> and Ganjun Yuan <sup>1,2,\*</sup>

<sup>1</sup> Biotechnological Engineering Center for Pharmaceutical Research and Development, Jiangxi Agricultural University, Nanchang 330045, China; zilong5716@163.com (Z.L.); 18270928169@163.com (P.L.); blossom\_xin@163.com (D.Z.); 18770910458@sohu.com (W.Z.)

<sup>2</sup> Laboratory of Natural Medicine and Microbiological Drug, College of Bioscience and Bioengineering, Jiangxi Agricultural University, Nanchang 330045, China; zjp13698090160@163.com

<sup>3</sup> School of Basic Medicine, Nanchang Medical College, Nanchang 330006, China; wangwang.jeff@foxmail.com

<sup>4</sup> School of Life Sciences, Sun Yat-sen University, Guangzhou 510275, China; lipeiibo@mail.sysu.edu.cn

\* Correspondence: gyuan@jxau.edu.cn; Tel.: +86-0791-8381-3459

† These authors contributed equally to this work.

## Contents

### 1. Experiments Details

Calculations for the quenching constants, the thermodynamic parameters and the Hill's coefficients

### 2. Figures

**Figure S1.** Basic analyses for the mass spectrometry data from the proteome of *S. aureus* treated with and without azalomycin F.

**Figure S2.** Schematic diagram of a KEGG pathway (as peptidoglycan biosynthesis) which significantly enriched differentially expressed proteins.

**Figure S3.** The expression levels of six proteins related to the LTA and cell envelope of *S. aureus* were verified using the PRM technology.

**Figure S4.** Enzyme activities of eLtaS (left), LtaS (middle) and LtaS-embedded liposome (right).

**Figure S5.** Stern-Volmer (left) and double logarithmic (right) plots of eLtaS quenched by azalomycin F respectively at 25°C (298 K) and 35°C (308 K) in five incubation systems.

**Figure S6.** Stern-Volmer (left) and double logarithmic (right) plots of eLtaS quenched by azalomycin F respectively at 25°C (298 K) and 35°C (308 K) in five incubation systems.

**Figure S7.** Synchronous fluorescence spectra of eLtaS and LtaS quenched by azalomycin F at 25°C.

**Figure S8.** Amino acid residues and sites of azalomycin F (AZF) binding to the LtaS.

### 3. Tables

**Table S1.** Amino acid residues of LtaS interacting with azalomycin F by ESI MS.

**Table S2.** The molecular docking of the guanidyl side chain of azalomycin F (AZF) and eLtaS.

**Table S3.** List of TOF/MS parameters.

## 1. Experimental Details

### Calculations for the quenching constant, thermodynamic parameters, and Hill's coefficient

To explore the quenching mechanism of azalomycin F to eLtaS or LtaS, the fluorescence quenching was analyzed according to the Stern–Volmer equation as follows:

$$F_0 / F = 1 + K_{sv}[Q] = 1 + K_q\tau_0[Q] \quad (1)$$

where  $F_0$  and  $F$  represent the maximum fluorescence intensity of eLtaS or LtaS in the absence and presence of azalomycin F, respectively;  $\tau_0$  is the average lifetime of fluorescent molecule without azalomycin F, approximately  $10^{-8}$  s [35];  $K_{sv}$  is the Stern–Volmer quenching constant, and  $K_q$  is the bimolecular quenching rate constant;  $[Q]$  is the concentration of azalomycin F.

Based on the linear regression plots of  $F_0 / F$  versus  $[Q]$  at different temperatures, the values of  $K_{sv}$  and  $K_q$  can be obtained from the corresponding slope.

To understand the binding constant and the number of binding sites of eLtaS or LtaS interacting with azalomycin F, the static quenching interaction was analyzed according to the double logarithm equation as follows [31]:

$$\lg[(F_0 - F) / F] = \lg K_a + n \lg[Q] \quad (2)$$

where  $F_0$  and  $F$  represent the maximum fluorescence intensity of eLtaS or LtaS in the absence and presence of azalomycin F, respectively.  $K_a$  is the binding constant,  $n$  is the number of binding sites between every eLtaS or LtaS and azalomycin F molecules, and  $[Q]$  is the concentration of azalomycin F.

Based on the double logarithmic plots of  $\lg[(F_0 - F)/F]$  versus  $\lg[Q]$  at different temperatures, the values of  $K_a$  and  $n$  can be obtained from the corresponding slope [32,33].

To elucidate the binding forces of eLtaS or LtaS interacting with azalomycin F, the thermodynamic parameters for each system were calculated from the van't Hoff equation [28,35,45]:

$$\ln(K_{a2} / K_{a1}) = \Delta H(1 / T_1 - 1 / T_2) / R \quad (3)$$

$$\Delta G = -RT \ln K_a \quad (4)$$

$$\Delta S = -(\Delta G - \Delta H) / T \quad (5)$$

where  $K_a$  is the binding constant, and  $T$  is the temperature;  $K_{a1}$  and  $K_{a2}$  are the binding constants for a system at two different temperatures  $T_1$  and  $T_2$ ;  $R$  is the gas constant, equal to  $8.314 \text{ J}/(\text{mol}\cdot\text{k})$ ;  $\Delta H$ ,  $\Delta G$  and  $\Delta S$  are the enthalpy change, Gibbs free energy and entropy change, respectively.

In biochemistry, the binding of a ligand molecule at one site of a macromolecule often influences the affinity for other ligand molecules at additional sites, and this is known as cooperative effect which can be quantitatively analyzed by Hill's coefficient ( $n_H$ ). Thereby, the  $n_H$  for each incubation system was analyzed according to Hill's equation as follows [46]:

$$\lg[Y / (1 - Y)] = \lg K_a + n_H \lg[Q] \quad (6)$$

where  $Y$  is the fraction of binding saturation, namely the fraction of sites occupied by the ligand;  $K_a$  is the binding constant, and  $[Q]$  is the concentration of azalomycin F;  $n_H$  is the Hill's coefficient.

Based on the linear regression plots of  $\lg[Y/(1 - Y)]$  versus  $\lg[Q]$  for each system at different temperature, the  $n_H$  can be obtained from the corresponding slope.

For Hill's equation,  $Y/(1 - Y)$  can be calculated from  $L$  and  $L_m$  according to the following formula [46]:

$$Y / (1 - Y) = L / (L_m - L) \quad (2)$$

$$L = 1 - F / F_0 \quad (3)$$

$$1/L = N + 1/L_m \cdot 1 / [Q] \quad (4)$$

where  $F_0$  and  $F$  represent the maximum fluorescence intensity of eLtaS or LtaS in the absence and presence of azalomycin F, respectively;  $1/L_m$  is the slope of the linear regression plot for  $1/L$  versus  $1/[Q]$ , and  $N$  is the intercept of the corresponding plot.

## 2. Figures

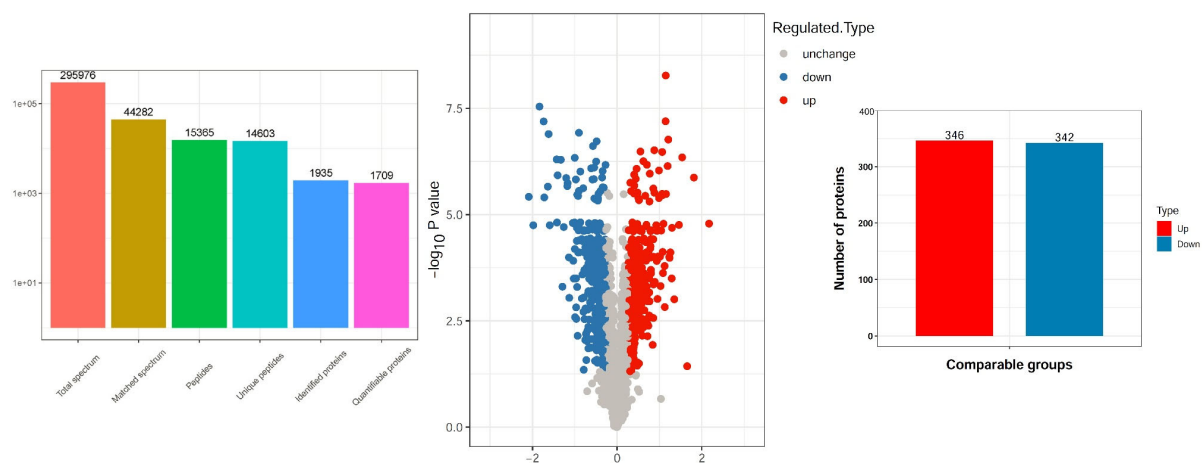

**Figure S1.** Basic analyses for the mass spectrometry data from the proteome of *S. aureus* treated with and without azalomycin F ( $n = 3$ ). Left, statistical chart of the mass spectrometry data; Middle, volcano map for the quantification of differentially expressed proteins; Right, column chart for the distribution of differentially expressed proteins.



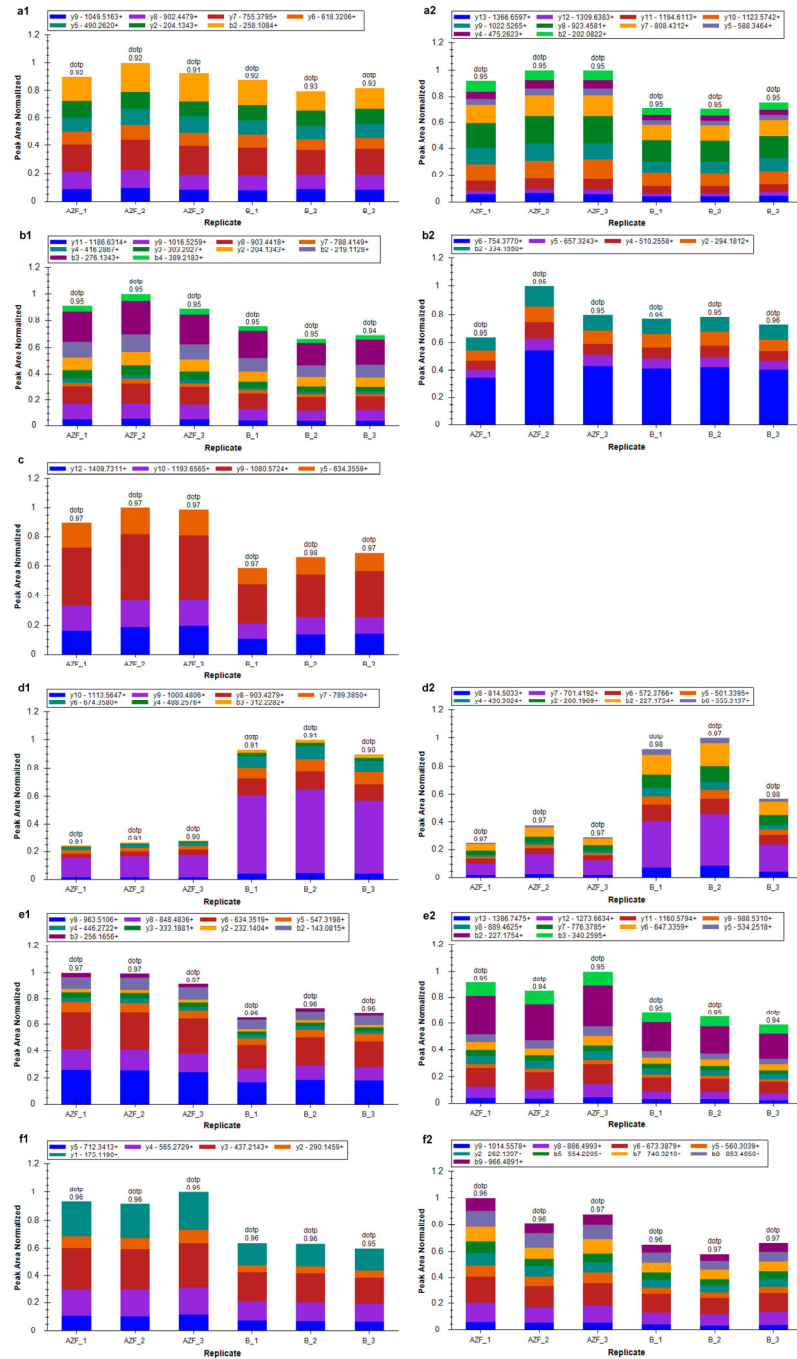

**Figure S3.** The expression levels of six proteins related to the LTA and cell envelope of *S. aureus* were verified using the PRM technology ( $n = 3$ ). AZF\_1, \_2 and \_3 means azalomycin F groups 1, 2 and 3; B\_1, \_2 and \_3 means blank groups 1, 2 and 3; **a1** and **a2** were respectively peak areas of fragment ions EQFTYFPNFFHQTGQ GK and SNTGDATVDGYIQTAR from protein Q2G093; **b1** and **b2** were respectively those of fragment ions AFGLIDEDQIVGK and FWPFSEFK from protein Q2FZT7; **c** was peak areas of fragment ion IIEFSELGEFIYQPVK from protein Q2G2L1; **d1** and **d2** were respectively those of fragment ions VVIPNDVSNQAR and LLEAAGLIK from protein Q2G0V0; **e1** and **e2** were respectively those of fragment ions AAIDTLSTLTGR and ILILGDVLELG ENSK from protein Q2FWH4; and **f1** and **f2** were respectively those of fragment ions EAFQFDR and SAEHEVSILTAQNV LNAIDK from protein Q2FWH3.

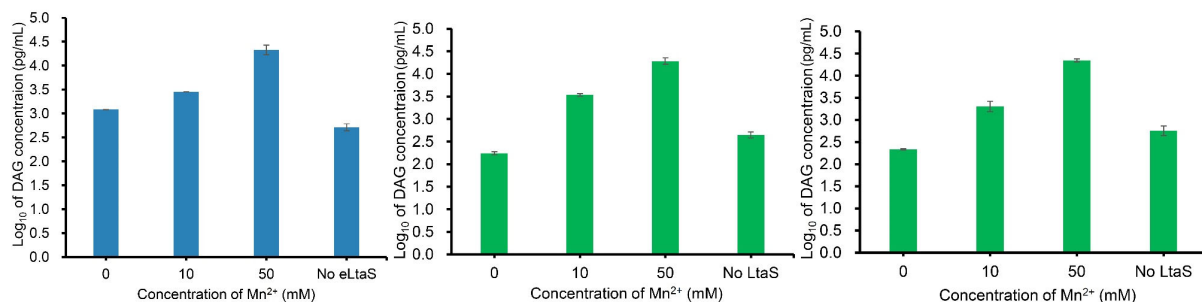

**Figure S4.** Enzyme activities of eLtaS (Left), LtaS (Middle) and LtaS-embedded liposome (Right) ( $n = 3$ ). The concentrations of eLtaS, LtaS and LtaS-embedded liposome were respectively 2.0, 0.75 and 0.75  $\mu\text{M}$ .

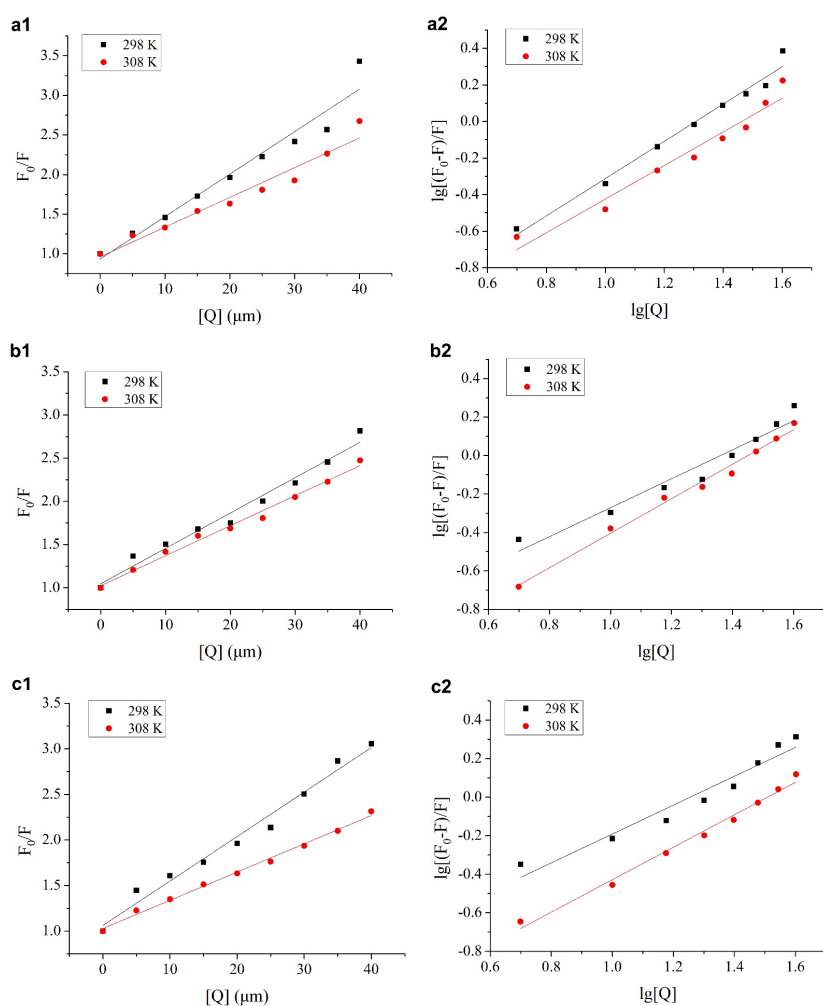

**Figure S5.** Stern-Volmer (left) and double logarithmic (right) plots of eLtaS quenched by azalomycin F respectively at 25°C (298 K) and 35°C (308 K) in five incubation systems. **a1** and **a2**, **b1** and **b2**, and **c1** and **c2** correspond to systems (A) eLtaS/azalomycin F, (B) eLtaS/DPPG/azalomycin F and (C) eLtaS/DPPG/MnCl<sub>2</sub>/azalomycin F, respectively.

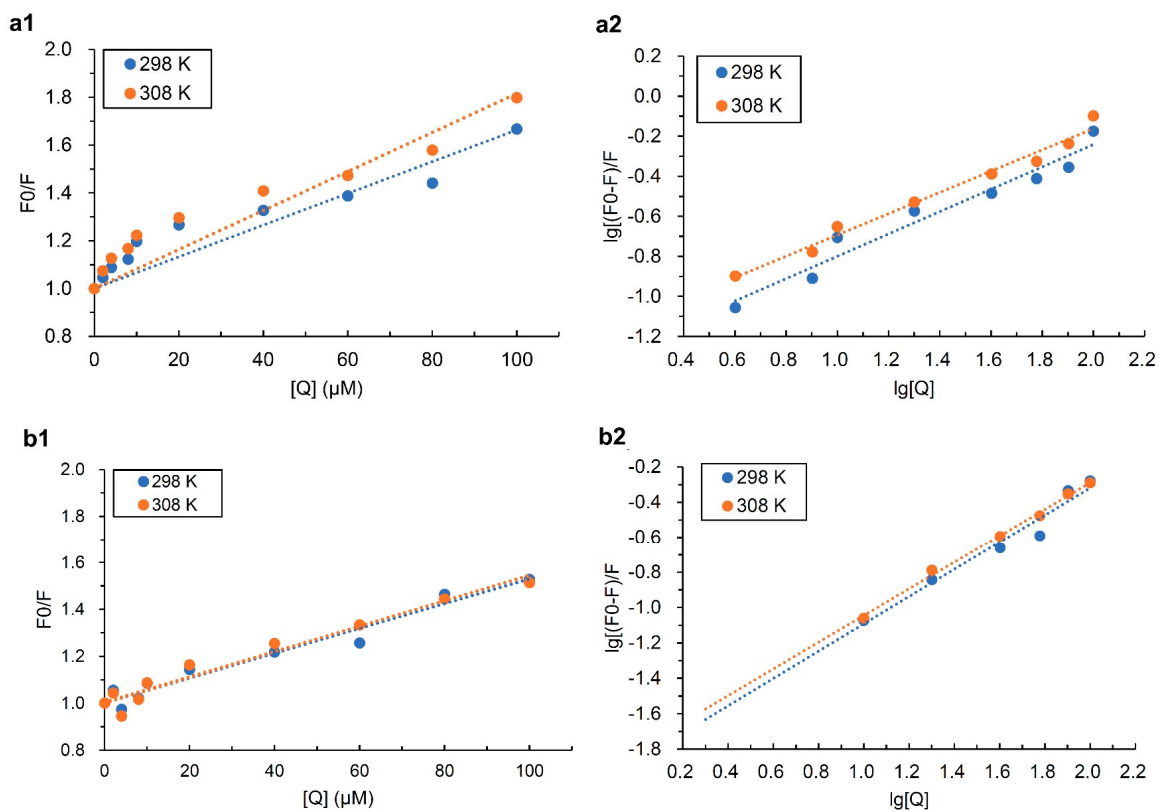

**Figure S6.** Stern-Volmer (left) and double logarithmic (right) plots of eLtaS quenched by azalomycin F respectively at 25°C (298 K) and 35°C (308 K) in five incubation systems. **a1** and **a2**, and **b1** and **b2** correspond to systems (D) LtaS-embedded liposome/azalomycin F, and (E) LtaS-embedded liposome/MnCl<sub>2</sub>/azalomycin F, respectively.

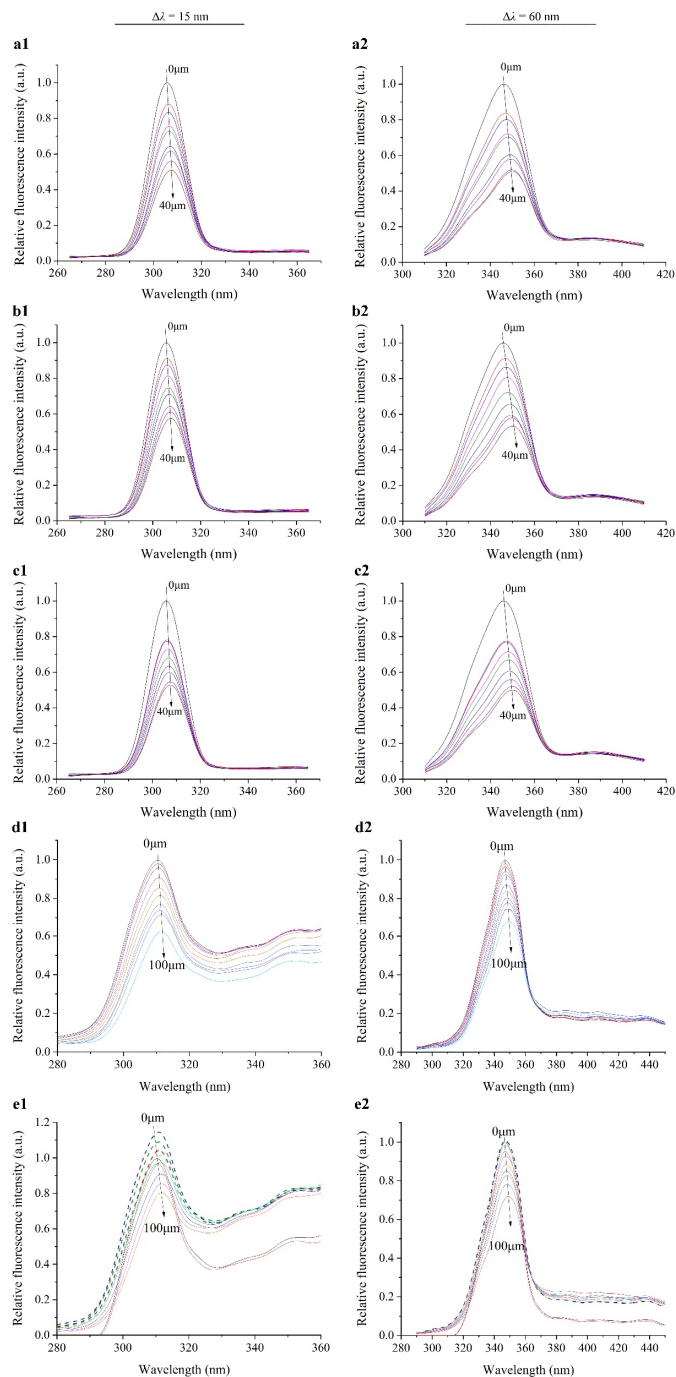

**Figure S7.** Synchronous fluorescence spectra of eLtaS and LtaS quenched by azalomycin F at 25°C. Systems (A), eLtaS/azalomycin F; (B), eLtaS/DPPG/azalomycin F; (C), eLtaS/DPPG/MnCl<sub>2</sub>/azalomycin F; (D), LtaS-embedded liposome/azalomycin F; and (E), LtaS-embedded liposome/MnCl<sub>2</sub>/azalomycin F. The tyrosine synchronous fluorescence spectra **a1** to **e1** of left column corresponded systems (A) to (E), with the wavelength difference ( $\Delta\lambda$ ) kept as 15 nm, and while the tryptophan synchronous fluorescence spectra **a2** to **e2** of right column corresponded systems (A) to (E), with the  $\Delta\lambda$  kept as 60 nm. For systems (A) to (C), the concentrations of azalomycin F were respectively 0, 5, 10, 15, 20, 25, 30, 35 and 40  $\mu$ M, and those of eLtaS were 5  $\mu$ M. For systems (D) and (E), the concentrations of azalomycin F were respectively 0, 2, 4, 8, 10, 20, 40, 60, 80 and 100  $\mu$ M, and those of LtaS-embedded liposome were 5  $\mu$ M.



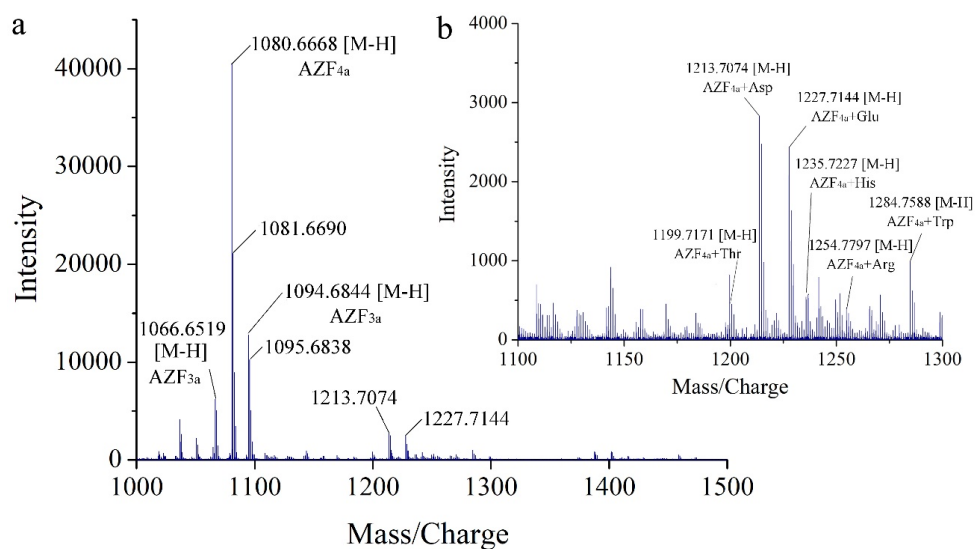

**Figure S8.** Amino acid residues and sites of azalomycin F (AZF) binding to the LtaS. **a:** electrospray ionization mass spectrometry analyses for the binding of azalomycin F to the amino acid residues of LtaS in negative ion mode; **b:** amplification for the mass-to-charge ratios from 1,100 to 1,300 in the mass spectra **a**.

### 3. Supplementary Tables

**Table S1:** Amino acid residues of LtaS interacting with azalomycin F by ESI MS.

| Complex <sup>a</sup>               | [M-H] <sup>-</sup> |            |           | M <sup>+</sup> |            |           |
|------------------------------------|--------------------|------------|-----------|----------------|------------|-----------|
|                                    | (m/z)              |            | Intensity | (m/z)          |            | Intensity |
|                                    | Observed           | Calculated |           | Observed       | Calculated |           |
| AZF <sub>4a</sub> /Aspartic acid   | 1213.7074          | 1213.6958  | 2833      | 1214.7105      | 1214.7037  | 2319      |
| AZF <sub>4a</sub> /Glutamic acid   | 1227.7144          | 1227.7115  | 2433      | 1228.7283      | 1228.7193  | 1600      |
| AZF <sub>4a</sub> /Tryptophan      | 1284.7588          | 1284.7482  | 986       | 1285.7655      | 1285.7560  | 623       |
| AZF <sub>4a</sub> /Histidine       | 1235.7227          | 1235.7278  | 502       | 1236.7398      | 1236.7356  | 571       |
| AZF <sub>4a</sub> /Threonine       | 1199.7171          | 1199.7166  | 447       | 1200.7291      | 1200.7244  | 285       |
| AZF <sub>4a</sub> /Arginine        | 1254.7797          | 1254.7700  | 406       | 1255.7846      | 1255.7779  | 334       |
| AZF <sub>4a</sub> /Phenylalanine   | 1245.7335          | 1245.7373  | 185       | 1246.7497      | 1246.7451  | 207       |
| AZF <sub>4a</sub> /Tyrosine        | 1261.7425          | 1261.7322  | 114       | 1262.7552      | 1262.7400  | 67        |
| DMAZF <sub>4a</sub> /Glutamic acid | 1141.7235          | 1141.7111  | 407       | 1142.7203      | 1142.7189  | 422       |
| DMAZF <sub>4a</sub> /Aspartic acid | 1127.7055          | 1127.6954  | 377       | 1128.7103      | 1128.7033  | 333       |
| DMAZF <sub>4a</sub> /Threonine     | 1113.7175          | 1113.7162  | 157       | 1114.7208      | 1114.7240  | 90        |
| DMAZF <sub>4a</sub> /Tryptophan    | 1198.7495          | 1198.7478  | 149       | 1199.7611      | 1199.7556  | 205       |
| DMAZF <sub>4a</sub> /Phenylalanine | 1159.7367          | 1159.7369  | 116       | 1160.7365      | 1160.7447  | 42        |
| DMAZF <sub>4a</sub> /Histidine     | 1149.7290          | 1149.7274  | 105       | 1150.7340      | 1150.7352  | 95        |
| DMAZF <sub>4a</sub> /Arginine      | 1168.7792          | 1168.7696  | 99        | 1169.7829      | 1169.7774  | 98        |
| DMAZF <sub>4a</sub> /Tyrosine      | 1175.7414          | 1175.7318  | 32        | 1176.7384      | 1176.7397  | 61        |

<sup>a</sup>: AZF<sub>4a</sub>, azalomycin F<sub>4a</sub>; DMAZF<sub>4a</sub>, demalonyl azalomycin F<sub>4a</sub>.

**Table S2:** The molecular docking of the guanidyl side chain of azalomycin F (AZF) and eLtaS.

| Residue <sup>a</sup> | Action<br>or Effect                              | Whole Molecule of AZF |                   |                   | Guanidyl Side Chain of AZF |                   |                   |
|----------------------|--------------------------------------------------|-----------------------|-------------------|-------------------|----------------------------|-------------------|-------------------|
|                      |                                                  | AZF <sub>3a</sub>     | AZF <sub>4a</sub> | AZF <sub>5a</sub> | AZF <sub>3a</sub>          | AZF <sub>4a</sub> | AZF <sub>5a</sub> |
| <b>Lys299</b>        | Stabling the LTA growth                          | — <sup>b</sup>        | —                 | —                 | —                          | —                 | —                 |
| Thr300               | Catalytic residue binding to Mn <sup>2+</sup>    |                       |                   |                   |                            |                   |                   |
| Glu255               |                                                  |                       |                   | —                 | —                          | —H                | —                 |
| Asp475               | Binding to Mn <sup>2+</sup>                      |                       |                   | —                 |                            |                   |                   |
| His476               |                                                  | —                     | —                 |                   | —                          |                   |                   |
| <b>His416</b>        | Binding to the substrates and protonating groups | —                     | —                 | —                 | —                          | —                 | —                 |
| His347               |                                                  |                       |                   | —                 | —H <sup>c</sup>            | —                 |                   |
| Asp349               |                                                  |                       |                   | —                 |                            |                   | —                 |
| Phe353               | Binding to the substrates                        | —                     | —                 | —                 | —                          |                   | —                 |
| <b>Trp354</b>        |                                                  | —                     | —                 | —                 | —                          | —                 | —                 |
| Arg356               |                                                  |                       |                   | —                 | —H                         |                   |                   |
| Leu384               |                                                  |                       |                   |                   | —                          |                   | —                 |
| Tyr477               | Stabling the LTA growth                          |                       | —                 | —                 |                            |                   |                   |
| Gly478               |                                                  | —                     | —                 | —                 |                            |                   | —                 |
| Ser480               |                                                  | —                     | —                 |                   |                            |                   |                   |
| Ala300               | Close to the residues of eLtaS active center     | —                     |                   | —                 |                            | —                 |                   |
| Ser256               |                                                  | —                     |                   |                   | —                          |                   | —                 |
| Leu413               |                                                  |                       |                   | —                 | —                          | —                 |                   |
| Tyr417               |                                                  |                       |                   |                   | —                          | —                 | —                 |

<sup>a</sup>: Amino acid residues of eltaS active center. Those marked bold indicated that there were interactions with the guanidyl side chain of azalomycin F for all dockings, and those marked brown were not but close to the residues of eLtaS active center. <sup>b</sup>: —, indicated that there were hydrophobic interactions between the residues and the guanidyl side chain. <sup>c</sup>: —H, indicated that there were hydrogen bond interactions between the residues and the guanidyl side chain, and while just one can form for those docking having two hydrogen bond interactions.

**Table S3.** List of TOF/MS parameters <sup>a</sup>.

| Parameters                  | Negative Mode |
|-----------------------------|---------------|
| ISVF                        | -4500 V       |
| TEM                         | 550 °C        |
| Gas 1                       | 50 psi        |
| Gas 2                       | 50 psi        |
| Curtain gas                 | 30 psi        |
| DP MS                       | -80 V         |
| CE in MS                    | -10 eV        |
| CE in MS/MS                 | -30 eV± 15 eV |
| Nebulizer and auxiliary gas | Nitrogen      |
| Scan range                  | 50-1600 da    |

<sup>a</sup>: Ionspray voltage floating (ISVF), The turbo spray temperature (TEM), Nebulizer gas (Gas 1), Heater gas (Gas 2), Curtain gas Declustering potential (DP), Collision energy in MS (CE in MS) and Collision energy in MS/MS (CE in MS/MS), Nebulizer and auxiliary gas, and scan range for negative ionization mode.
